# Supplementary material for: Bacteria Death and Osteoblast Metabolic Activity Correlated to Hydrothermally Synthesised TiO2 Surface Properties
Source: PubMed Central journal article supplement (PMC6480334; doi:10.3390/molecules24071201), 2019-03-27
Supplement: molecules-24-01201-s001.pdf [file molecules-24-01201-s001.pdf]

## Supporting Information for

# Bacteria Death and Osteoblast Metabolic Activity Correlated to Hydrothermally Synthesised TiO<sub>2</sub> Surface Properties

Alka Jaggesar<sup>1,2</sup>, Asha Mathew<sup>2</sup>, Tuquabo Tesfamichael<sup>1</sup>, Hongxia Wang<sup>1</sup>, Cheng Yan<sup>1</sup> and Prasad KDV Yarlagadda<sup>1,2,\*</sup>

<sup>1</sup> Science and Engineering Faculty, Queensland University of Technology, 2 George Street, Brisbane QLD 4001, Australia; a.jaggesar@hdr.qut.edu.au (A.J.); t.tesfamichael@qut.edu.au (T.T.); hx.wang@qut.edu.au (H.W.); c2.yan@qut.edu.au (C.Y.)

<sup>2</sup> Institute of Health and Biomedical Innovation, Queensland University of Technology, 60 Musk Avenue, Kelvin Grove QLD 4059, Australia; asha.mathew@qut.edu.au (A.M.)

\* Correspondence: y.prasad@qut.edu.au

Table 1: *S.aureus* average CFU/mL results.

| Sample     | 0 H CFU/mL  | 3 H CFU/mL  | 18 H CFI/mL |
|------------|-------------|-------------|-------------|
| Control    | 15014233.99 | 30609866.88 | 21228916.92 |
| Flat       | 15014233.99 | 25392990.19 | 20105402.81 |
| 1.0_3_240  | 15014233.99 | 14055711.46 | 14511402.5  |
| 2.0_3_240  | 15014233.99 | 13702158.07 | 16145604.84 |
| 0.1_3_240  | 15014233.99 | 37343094.79 | 494974.7468 |
| 1.0_3_120  | 15014233.99 | 2223457.99  | 1241365.238 |
| 1.0_1_240  | 15014233.99 | 11887250.67 | 4124789.557 |
| 2.0_10_240 | 15014233.99 | 15564205.93 | 8736697.119 |

Table 2: *P.aeruginosa* average CFU/mL results.

| Sample     | 0 H CFU/mL  | 3 H CFU/mL  | 18 H CFI/mL |
|------------|-------------|-------------|-------------|
| Control    | 329922222.2 | 25834074074 | 76752222222 |
| Flat       | 329922222.2 | 29689629630 | 1.06649E+11 |
| 1.0_3_240  | 329922222.2 | 16922962963 | 60173333333 |
| 2.0_3_240  | 53216666.67 | 23402222222 | 1.29672E+11 |
| 0.1_3_240  | 53216666.67 | 40871111111 | 1.23652E+11 |
| 1.0_3_120  | 53216666.67 | 24856111111 | 1.22388E+11 |
| 1.0_1_240  | 53216666.67 | 36184444444 | 1.29311E+11 |
| 2.0_10_240 | 53216666.67 | 42376111111 | 1.41044E+11 |

Table 3: AlamarBlue™ test results averaged.

| Sample    | 4 H Activity (%) | 24 H Activity (%) |
|-----------|------------------|-------------------|
| Flat      | 100              | 100               |
| 1.0_3_240 | 104.429          | 82.52287          |
| 2.0_3_240 | 104.3596         | 83.89352          |
| 0.1_3_240 | 111.1907         | 103.918           |

|            |          |          |
|------------|----------|----------|
| 1.0_3_120  | 108.4379 | 92.82887 |
| 1.0_1_240  | 95.18652 | 80.75645 |
| 2.0_10_240 | 120.6004 | 87.88418 |
